# Supplementary material
Source: publisher site journal article supplement (http://www.dovepress.com/get_supplementary_file.php?f=231873.docx)
Supplement: Supplementary file 1 [file get_supplementary_file.php]

|  | | |
| --- | --- | --- |
| **Appendix I**  **Diagnoses codes used to identify the types of chronic conditions** | | |
| **Type of Chronic Conditions** | **ICD-10-CM Codes** | **SNOMED Codes** |
| **Cardiovascular Conditions** |  |  |
| **Diabetes** | E11, E11.9, E14.9 | 121589010, 502372015 |
| Ischemic heart disease | I25, I25.9 | 2534671011, 2537479013, 397667016, 2534663012 |
| Dyslipidemia | E78.5 | 92826017, 1209706018 |
| **Musculoskeletal Conditions** |  |  |
| Osteoarthritis |  | 1776248011, 359420013, 359421012, 1785522017 |
| Osteoporosis | M81.99 | 453855011, 107806013 |
| **Respiratory Conditions** |  |  |
| Asthma | J45 | 301485011, 301480018 |
| **Mental Health Conditions** |  |  |
| Anxiety | F41.8, F41.9 | 346980013, 369987018, 303689015, 481155011, 81133019 |
| Depression | F31.3 | 486186018, 486187010, 110183011, 346973011, 346979010, 55208011, 454082014, 486187010, 124707013, 1208903011, 490537016, 346980013, 1228731019, 486184015 |
